# Supplementary material for: Plasma microRNA expression levels in HIV-1-positive patients receiving antiretroviral therapy
Source: Oxford University Press journal article supplement (doi:10.1042/bsr20194433), 2020-04-22
Supplement: bsr-2019-4433_supp.pdf [file bsr-2019-4433_supp.pdf]

**Table S1 Comparison of miRNA expression by HAART regimens**

**Estadísticas de grupo**

|            | Treat       | N  | Media | Desv. Desviación | Desv. Error promedio |
|------------|-------------|----|-------|------------------|----------------------|
| miR-16-5p  | FTC+TDF+EFV | 16 | .6214 | .87630           | .21907               |
|            | AZT+3TC+PI  | 4  | .6558 | .47885           | .23943               |
| miR-26a-5p | FTC+TDF+EFV | 16 | .9913 | 1.66087          | .41522               |
|            | AZT+3TC+PI  | 4  | .3957 | .36128           | .18064               |
| miR-150-5p | FTC+TDF+EFV | 16 | .5699 | .79037           | .19759               |
|            | AZT+3TC+PI  | 4  | .5837 | .46852           | .23426               |

FTC+TDF+EFV, (n = 8 / group) versus AZT+3TC+PI (n = 2 / group)

|            |                                | Prueba de Levene de igualdad de varianzas |      | prueba t para la igualdad de medias |        |                  |                      |                              |                                                |          |
|------------|--------------------------------|-------------------------------------------|------|-------------------------------------|--------|------------------|----------------------|------------------------------|------------------------------------------------|----------|
|            |                                | F                                         | Sig. | t                                   | gl     | Sig. (bilateral) | Diferencia de medias | Diferencia de error estándar | 95% de intervalo de confianza de la diferencia |          |
|            |                                |                                           |      |                                     |        |                  |                      |                              | Inferior                                       | Superior |
| miR-16-5p  | Se asumen varianzas iguales    | 1.429                                     | .247 | -.075                               | 18     | .941             | -.03436              | .46034                       | -1.00151                                       | .93279   |
|            | No se asumen varianzas iguales |                                           |      | -.106                               | 8.881  | .918             | -.03436              | .32453                       | -.77000                                        | .70127   |
| miR-26a-5p | Se asumen varianzas iguales    | 4.263                                     | .054 | .699                                | 18     | .493             | .59563               | .85156                       | -1.19344                                       | 2.38469  |
|            | No se asumen varianzas iguales |                                           |      | 1.315                               | 17.993 | .205             | .59563               | .45281                       | -.35572                                        | 1.54697  |
| miR-150-5p | Se asumen varianzas iguales    | 2.046                                     | .170 | -.033                               | 18     | .974             | -.01380              | .41727                       | -.89045                                        | .86285   |
|            | No se asumen varianzas iguales |                                           |      | -.045                               | 7.979  | .965             | -.01380              | .30647                       | -.72083                                        | .69323   |

There was no statistically significant difference in comparing miRNA expression between groups received the HAART. Regimens consisting of emtricitabine (FTC), tenofovir (TDF) and efavirenz (EFV) *versus* zidovudine (AZT), lamivudine (3TC) and protease inhibitors (PI).

**Table S2** General data for patients with non-resistance and resistance to HAART

| Position | Mature ID       | Average Cq       |                      | Standard Deviation |                      |
|----------|-----------------|------------------|----------------------|--------------------|----------------------|
|          |                 | Resistance group | Non-resistance group | Resistance group   | Non-resistance group |
| A01      | hsa-let-7a-5p   | 20.422           | 19.778               | 2.77155552         | 6.670447511          |
| A02      | hsa-miR-1-3p    | 23.112           | 22.038               | 2.519805548        | 2.067067972          |
| A03      | hsa-miR-100-5p  | 21.832           | 20.358               | 5.389612231        | 2.620614432          |
| A04      | hsa-miR-106b-5p | 16.562           | 15.752               | 0.887085114        | 0.816008578          |
| A05      | hsa-miR-10b-5p  | 19.958           | 22.256               | 5.663247302        | 2.292843213          |
| A06      | hsa-miR-122-5p  | 19.776           | 16.992               | 2.649052661        | 3.912258938          |
| A07      | hsa-miR-124-3p  | 20.316           | 22.102               | 4.495362054        | 3.677134754          |
| A08      | hsa-miR-125b-5p | 21.21            | 19.35                | 1.118995085        | 2.125170581          |
| A09      | hsa-miR-126-3p  | 15.718           | 12.6                 | 3.69931345         | 1.476228302          |
| A10      | hsa-miR-133a-3p | 24.628           | 26.312               | 2.408582571        | 2.415299153          |
| A11      | hsa-miR-133b    | 25.292           | 24.756               | 1.894959102        | 3.463182063          |
| A12      | hsa-miR-134-5p  | 21.036           | 20.72                | 0.891924885        | 1.836926781          |
| B01      | hsa-miR-141-3p  | 23.2             | 25.188               | 2.325704194        | 1.080425842          |
| B02      | hsa-miR-143-3p  | 20.216           | 20.39                | 0.548023722        | 0.721907196          |
| B03      | hsa-miR-146a-5p | 17.408           | 14.756               | 2.273668841        | 1.900705132          |
| B04      | hsa-miR-150-5p  | 16.156           | 16.242               | 5.772701274        | 2.666621458          |
| B05      | hsa-miR-155-5p  | 20.908           | 21.728               | 4.736160893        | 2.188485778          |
| B06      | hsa-miR-17-5p   | 15.32            | 15.342               | 1.382624316        | 0.804748408          |
| B07      | hsa-miR-17-3p   | 22.14            | 21.898               | 1.240866633        | 0.733668863          |
| B08      | hsa-miR-18a-5p  | 17.834           | 16.826               | 0.731354907        | 0.855178344          |
| B09      | hsa-miR-192-5p  | 18.114           | 18.002               | 3.614730972        | 2.261895223          |
| B10      | hsa-miR-195-5p  | 16.95            | 12.99                | 6.231612953        | 1.074755786          |
| B11      | hsa-miR-196a-5p | 22.26            | 24.818               | 6.17959141         | 3.118151696          |
| B12      | hsa-miR-19a-3p  | 16.79            | 15.262               | 1.329793217        | 1.080981036          |
| C01      | hsa-miR-19b-3p  | 18.382           | 15.216               | 5.432579498        | 1.144303281          |
| C02      | hsa-miR-200a-3p | 25.39            | 25.56                | 3.180338032        | 1.48593405           |
| C03      | hsa-miR-200b-3p | 22.98            | 22.128               | 0.997120855        | 2.108949976          |
| C04      | hsa-miR-200c-3p | 21.824           | 22.392               | 2.444223803        | 4.918035177          |
| C05      | hsa-miR-203a-3p | 24.426           | 25.18                | 3.117904745        | 2.878541297          |
| C06      | hsa-miR-205-5p  | 23.298           | 25.056               | 3.619097954        | 1.533649243          |
| C07      | hsa-miR-208a-3p | 24.685           | 26.488               | 8.011776748        | 4.541725443          |

|     |                |        |        |             |             |
|-----|----------------|--------|--------|-------------|-------------|
|     | 3p             |        |        |             |             |
| C08 | hsa-miR-20a-5p | 16.388 | 14.034 | 2.698206812 | 1.047201031 |
| C09 | hsa-miR-21-5p  | 15.61  | 12.492 | 3.648999863 | 1.560022436 |
| C10 | hsa-miR-210-3p | 17.534 | 21.542 | 3.437008874 | 4.356244943 |
| C11 | hsa-miR-214-3p | 23.51  | 25.038 | 3.058463667 | 1.411407099 |
| C12 | hsa-miR-215-5p | 24.07  | 23.618 | 4.119447779 | 2.384810265 |
| D01 | hsa-miR-221-3p | 15.654 | 14.412 | 2.119877355 | 1.6748791   |
| D02 | hsa-miR-222-3p | 18.468 | 15.3   | 5.35422917  | 1.652392205 |
| D03 | hsa-miR-223-3p | 16.172 | 10.858 | 6.646071772 | 2.635340585 |
| D04 | hsa-miR-224-5p | 17.95  | 18.65  | 3.638729174 | 2.733175808 |

| Position | Mature ID       | Average Cq       |                      | Standard Deviation |                      |
|----------|-----------------|------------------|----------------------|--------------------|----------------------|
|          |                 | Resistance group | Non-resistance group | Resistance group   | Non-resistance group |
| D05      | hsa-miR-23a-3p  | 15.802           | 12.254               | 3.641479095        | 2.136593082          |
| D06      | hsa-miR-25-3p   | 16.712           | 14.084               | 1.33460481         | 2.125365851          |
| D07      | hsa-miR-27a-3p  | 13.236           | 14.264               | 3.524248856        | 0.815125757          |
| D08      | hsa-miR-296-5p  | 21.806           | 23.83                | 2.778296241        | 2.250455509          |
| D09      | hsa-miR-29a-3p  | 18.932           | 17.17                | 3.131927522        | 0.631585307          |
| D10      | hsa-miR-30d-5p  | 16.3             | 14.34                | 2.204846933        | 1.780828459          |
| D11      | hsa-miR-34a-5p  | 21.146           | 21.282               | 1.422736799        | 2.042540085          |
| D12      | hsa-miR-375     | 20.836           | 21.72                | 3.859472762        | 2.06329833           |
| E01      | hsa-miR-423-5p  | 18.578           | 15.826               | 5.295027856        | 2.319219696          |
| E02      | hsa-miR-499a-5p | 25.348           | 26.562               | 8.325005706        | 1.694526483          |
| E03      | hsa-miR-574-3p  | 20.65            | 18.838               | 0.678454125        | 2.152282509          |
| E04      | hsa-miR-885-5p  | 24.528           | 22.352               | 1.130628144        | 3.039690774          |
| E05      | hsa-miR-9-5p    | 24.168           | 25.298               | 3.956787839        | 1.627181612          |
| E06      | hsa-miR-92a-3p  | 16.578           | 11.81                | 5.514695821        | 2.17637313           |
| E07      | hsa-miR-93-5p   | 16.388           | 15.1                 | 1.458139225        | 0.897217922          |
| E08      | hsa-let-7c-5p   | 19.6             | 18.386               | 0.596112406        | 2.453788907          |
| E09      | hsa-miR-107     | 19.632           | 19.412               | 2.007802281        | 1.665674038          |
| E10      | hsa-miR-10a-5p  | 21.004           | 21.996               | 3.49086379         | 2.477302969          |
| E11      | hsa-miR-128-3p  | 18.056           | 18.846               | 1.996504445        | 2.909455275          |
| E12      | hsa-miR-130b-3p | 19.464           | 19.632               | 1.316123095        | 1.788706236          |
| F01      | hsa-miR-145-5p  | 18.658           | 18.154               | 1.679559466        | 0.653972476          |
| F02      | hsa-miR-148a-3p | 17.762           | 16.954               | 0.77972431         | 1.417702367          |
| F03      | hsa-miR-15a-5p  | 18.052           | 18.06                | 1.007109726        | 0.393573373          |
| F04      | hsa-miR-184     | 26.126           | 28.266               | 3.618263396        | 3.949237901          |
| F05      | hsa-miR-193a-5p | 21.448           | 22.38                | 1.38396893         | 3.237491313          |
| F06      | hsa-miR-204-5p  | 22.954           | 23.618               | 3.272228598        | 2.447227002          |
| F07      | hsa-miR-206     | 23.62            | 25.548               | 6.572035453        | 2.32229843           |
| F08      | hsa-miR-211-5p  | 22.532           | 25.652               | 11.1951226         | 2.018853635          |
| F09      | hsa-miR-26b-5p  | 16.688           | 15.412               | 0.898871515        | 1.988283179          |
| F10      | hsa-miR-30e-5p  | 17.148           | 15.91                | 2.275844898        | 0.710703876          |

|     |                 |        |        |             |             |
|-----|-----------------|--------|--------|-------------|-------------|
| F11 | hsa-miR-372-3p  | 27.598 | 27.984 | 1.609975155 | 1.062958137 |
| F12 | hsa-miR-373-3p  | 26.986 | 26.268 | 1.624863071 | 2.899477539 |
| G01 | hsa-miR-374a-5p | 19.48  | 17.734 | 1.118928058 | 2.519430491 |
| G02 | hsa-miR-376c-3p | 20.7   | 20.416 | 0.983564944 | 1.360599133 |
| G03 | hsa-miR-7-5p    | 21.56  | 19.546 | 2.47655002  | 2.224922471 |
| G04 | hsa-miR-96-5p   | 20.812 | 26.968 | 8.02200536  | 1.759849425 |
| G05 | hsa-miR-103a-3p | 16.8   | 15.696 | 3.199023288 | 1.05573671  |
| G06 | hsa-miR-15b-5p  | 17.122 | 14.262 | 3.049216293 | 1.447798328 |
| G07 | hsa-miR-16-5p   | 13.836 | 11.72  | 1.559753186 | 1.069462482 |
| G08 | hsa-miR-191-5p  | 16.28  | 13.058 | 4.54014317  | 1.779991573 |
| G09 | hsa-miR-22-3p   | 14.35  | 15.51  | 1.686475615 | 0.620040321 |
| G10 | hsa-miR-24-3p   | 15.912 | 13.774 | 3.043167757 | 1.52878383  |
| G11 | hsa-miR-26a-5p  | 16.27  | 12.14  | 5.109500954 | 1.557032434 |

| Position | Mature ID     | Average Cq       |                      | Standard Deviation |                      |
|----------|---------------|------------------|----------------------|--------------------|----------------------|
|          |               | Resistance group | Non-resistance group | Resistance group   | Non-resistance group |
| G12      | hsa-miR-31-5p | 25.26            | 26.996               | 5.277120427        | 2.388855374          |
| H02      | cel-miR-39-3p | 16.268           | 14.522               | 2.388497436        | 0.751212353          |
| H03      | SNORD61       | 20.478           | 24.462               | 3.834458241        | 1.860610115          |
| H04      | SNORD68       | 21.988           | 23.382               | 3.275846455        | 2.538802867          |
| H05      | SNORD72       | 27.726           | 28.324               | 2.177826899        | 1.049895233          |
| H06      | SNORD95       | 20.414           | 20.77                | 1.9917781          | 2.548067895          |
| H07      | SNORD96A      | 22.356           | 23.168               | 1.702932764        | 2.336615073          |
| H08      | RNU6-6P       | 23.938           | 24.96                | 0.638725293        | 1.624115144          |
| H09      | miRTC         | 14.848           | 14.384               | 1.699211582        | 0.937245966          |
| H10      | miRTC         | 14.888           | 14.494               | 1.707240463        | 0.847012397          |
| H11      | PPC           | 14.142           | 14.68                | 0.289948271        | 0.5703946            |
| H12      | PPC           | 14.3             | 14.772               | 0.371954298        | 0.332445484          |

**Abbreviations:** ID:Identification; Cq: quantification Cycles.
